# Supplementary material for: Fat Mass–and Obesity-Associated (FTO) Gene Variant Is Associated With Obesity
Source: Oxford University Press journal article supplement (doi:10.2337/db08-0006), 2008-07-23
Supplement: db08-0006_suppl.doc [file db08-0006_suppl.doc]

**Appendix Figure 1**. The geometric means of BMI by the genotypes of *FTO* SNP rs9939609 at two-year cycles from cohort baseline (1986 for men and 1976 for women) through 2002 among **(a)** men, and **(b)** women. The analyses were adjusted for age and diabetes status. *: P<0.05.

**Appendix Figure 2**. Odds ratios of obesity associated with the TA and AA genotypes of *FTO* SNP rs9939609 compared with TT genotype in two-year cycles from cohort baseline (1986 for men and 1976 for women) through 2002 among **(a)** men, and **(b)** women. The analyses were adjusted for age and diabetes status. Error bars denote 95 percent confidence intervals.

**Appendix Figure 3**. Expression profile of *FTO* gene. The relative expression levels of *FTO* gene are presented for a range of **(a)** human tissues, and **(b)** mouse tissues from wild type C56BL/6 mice. The expression levels were determined by real-time RT-PCR analysis.
